# Supplementary material for: Characterization of LP-Z Lipoprotein Particles and Quantification in Subjects with Liver Disease Using a Newly Developed NMR-Based Assay
Source: PubMed Central journal article supplement (PMC7564541; doi:10.3390/jcm9092915), 2020-09-10
Supplement: jcm-09-02915-s001.pdf [file jcm-09-02915-s001.pdf]

## Supplementary material

Supplementary Table 1. Concentrations of lipids and metabolites for isolated LDL (n=4) versus LP-Z particles (n=4).

| <b>Lipids/Metabolites</b>       | <b>LDL</b>         | <b>LP-Z</b>        | <b>Ratio LPZ/LDL</b> | <b>p-value</b> |
|---------------------------------|--------------------|--------------------|----------------------|----------------|
| Malonylcarnitine                | 0.000 ± 0.000      | 0.005 ± 0.010      | 5.0                  | 0.356          |
| Hydroxypropionylcarnitine       | 0.000 ± 0.000      | 0.003 ± 0.006      |                      | 0.356          |
| Propenylcarnitine               | 0.000 ± 0.000      | 0.006 ± 0.007      | 6.0                  | 0.170          |
| Butyrylcarnitine                | 0.000 ± 0.000      | 0.006 ± 0.012      | 6.0                  | 0.356          |
| Pimelylcarnitine                | 0.009 ± 0.018      | 0.008 ± 0.015      |                      | 0.915          |
| Tetradecenylcarnitine           | 0.012 ± 0.003      | 0.011 ± 0.001      |                      | 0.584          |
| Hexadecanoylcarnitine           | 0.002 ± 0.004      | 0.041 ± 0.019      | 18.8                 | <b>0.007</b>   |
| Hydroxyhexadecanoylcarnitine    | 0.000 ± 0.000      | 0.001 ± 0.002      |                      | 0.356          |
| Hexadecenylcarnitine            | 0.000 ± 0.000      | 0.011 ± 0.014      | 11.0                 | 0.196          |
| Octadecanoylcarnitine           | 0.001 ± 0.003      | 0.015 ± 0.005      | 10.7                 | <b>0.004*</b>  |
| Octadecenylcarnitine            | 0.000 ± 0.000      | 0.024 ± 0.029      | 24.0                 | 0.153          |
| Hydroxyoctadecenylcarnitine     | 0.000 ± 0.000      | 0.001 ± 0.002      |                      | 0.356          |
| <b>Total Acylcarnitines</b>     | <b>0.03 ± 0.02</b> | <b>0.13 ± 0.08</b> | <b>5.3</b>           | <b>0.036</b>   |
| 3-Methylhistidine               | 0.000 ± 0.000      | 0.001 ± 0.001      |                      | 0.136          |
| Creatinine                      | 0.000 ± 0.000      | 0.80 ± 1.60        | 800                  | 0.356          |
| Cystine                         | 0.000 ± 0.000      | 0.014 ± 0.025      | 14.0                 | 0.321          |
| Kynurenine                      | 0.037 ± 0.074      | 0.000 ± 0.000      | 0.03                 | 0.356          |
| trans-4-Hydroxyproline          | 0.063 ± 0.080      | 0.11 ± 0.05        |                      | 0.327          |
| <b>Total Amino Acid Related</b> | <b>0.10 ± 0.12</b> | <b>0.93 ± 1.6</b>  | <b>9.3</b>           | 0.346          |
| Asparagine                      | 0.14 ± 0.16        | 0.066 ± 0.077      |                      | 0.443          |
| Cysteine                        | 0.36 ± 0.06        | 0.43 ± 0.19        |                      | 0.457          |
| Leucine                         | 0.21 ± 0.43        | 0.12 ± 0.24        |                      | 0.721          |
| <b>Total Amino Acids</b>        | <b>0.71 ± 0.58</b> | <b>0.62 ± 0.34</b> | <b>0.9</b>           | 0.804          |
| Chenodeoxycholic acid           | 0.000 ± 0.000      | 0.008 ± 0.005      | 8.0                  | <b>0.023</b>   |
| Glycocholic acid                | 0.009 ± 0.006      | 0.43 ± 0.26        | 47.4                 | <b>0.018</b>   |
| Glycochenodeoxycholic acid      | 0.005 ± 0.003      | 0.84 ± 0.38        | 167                  | <b>0.005*</b>  |
| Glycodeoxycholic acid           | 0.002 ± 0.004      | 0.021 ± 0.037      | 8.5                  | 0.362          |
| Glycolithocholic acid           | 0.000 ± 0.001      | 0.001 ± 0.001      |                      | 0.299          |

|                                       |                      |                      |            |               |
|---------------------------------------|----------------------|----------------------|------------|---------------|
| Glycolithocholic acid sulfate         | 0.000 ± 0.000        | 0.002 ± 0.003        |            | 0.199         |
| Taurocholic acid                      | 0.000 ± 0.000        | 0.65 ± 0.64          | 650        | 0.089         |
| Taurochenodeoxycholic acid            | 0.005 ± 0.004        | 1.4 ± 0.7            | 291        | <b>0.005*</b> |
| Taurodeoxycholic acid                 | 0.001 ± 0.002        | 0.000 ± 0.000        |            | 0.356         |
| <b>Total Bile Acids</b>               | <b>0.023 ± 0.016</b> | <b>3.3 ± 1.4</b>     | <b>146</b> | <b>0.003</b>  |
| <b>Dopamine</b>                       | <b>0.009 ± 0.018</b> | <b>0.011 ± 0.022</b> |            | 0.878         |
| <b>Hexose</b>                         | <b>0.000 ± 0.000</b> | <b>307 ± 614</b>     | <b>307</b> | 0.356         |
| <b>Cortisol</b>                       | <b>0.000 ± 0.000</b> | <b>0.002 ± 0.004</b> |            | 0.356         |
| <b>Dehydroepiandrosterone sulfate</b> | <b>0.005 ± 0.009</b> | <b>0.000 ± 0.000</b> | <b>0.2</b> | 0.623         |
| <b>Indoxylsulfate</b>                 | <b>0.002 ± 0.003</b> | <b>0.002 ± 0.003</b> |            | 0.776         |
| Ceramide (d16:1/18:0)                 | 0.053 ± 0.005        | 0.083 ± 0.079        |            | 0.476         |
| Ceramide (d16:1/20:0)                 | 0.051 ± 0.008        | 0.076 ± 0.074        |            | 0.537         |
| Ceramide (d16:1/22:0)                 | 0.17 ± 0.02          | 0.13 ± 0.10          |            | 0.534         |
| Ceramide (d16:1/23:0)                 | 0.082 ± 0.004        | 0.041 ± 0.029        | 0.5        | <b>0.029</b>  |
| Ceramide (d16:1/24:0)                 | 0.13 ± 0.02          | 0.046 ± 0.17         | 0.4        | <b>0.001*</b> |
| Ceramide (d18:1/14:0)                 | 0.014 ± 0.029        | 0.062 ± 0.017        | 4.3        | <b>0.029</b>  |
| Ceramide (d18:1/16:0)                 | 0.24 ± 0.03          | 0.53 ± 0.15          | 2.2        | <b>0.009</b>  |
| Ceramide (d18:1/18:0(OH))             | 0.038 ± 0.076        | 0.24 ± 0.10          | 6.4        | <b>0.017</b>  |
| Ceramide (d18:1/18:0)                 | 0.10 ± 0.02          | 0.24 ± 0.24          |            | 0.310         |
| Ceramide (d18:1/18:1)                 | 0.006 ± 0.012        | 0.018 ± 0.014        |            | 0.250         |
| Ceramide (d18:1/20:0(OH))             | 0.19 ± 0.01          | 0.55 ± 0.29          | 2.9        | <b>0.045</b>  |
| Ceramide (d18:1/20:0)                 | 0.066 ± 0.006        | 0.14 ± 0.11          |            | 0.240         |
| Ceramide (d18:1/22:0)                 | 0.41 ± 0.08          | 0.44 ± 0.24          |            | 0.802         |
| Ceramide (d18:1/23:0)                 | 0.48 ± 0.12          | 0.35 ± 0.16          |            | 0.239         |
| Ceramide (d18:1/24:0)                 | 1.3 ± 0.3            | 0.73 ± 0.21          | 0.6        | <b>0.019</b>  |
| Ceramide (d18:1/24:1)                 | 0.48 ± 0.04          | 1.3 ± 0.6            | 2.8        | <b>0.022</b>  |
| Ceramide (d18:1/25:0)                 | 0.26 ± 0.02          | 0.25 ± 0.06          |            | 0.873         |
| Ceramide (d18:1/26:0)                 | 0.082 ± 0.056        | 0.034 ± 0.014        |            | 0.147         |
| Ceramide (d18:1/26:1)                 | 0.018 ± 0.008        | 0.030 ± 0.011        |            | 0.124         |
| Ceramide (d18:2/16:0)                 | 0.046 ± 0.007        | 0.089 ± 0.018        | 1.9        | <b>0.004</b>  |
| Ceramide (d18:2/18:0)                 | 0.035 ± 0.003        | 0.057 ± 0.049        |            | 0.404         |
| Ceramide (d18:2/18:1)                 | 0.004 ± 0.005        | 0.007 ± 0.005        |            | 0.484         |
| Ceramide (d18:2/20:0)                 | 0.032 ± 0.007        | 0.056 ± 0.036        |            | 0.237         |

|                                 |                  |                  |            |              |
|---------------------------------|------------------|------------------|------------|--------------|
| Ceramide (d18:2/22:0)           | 0.105 ± 0.022    | 0.095 ± 0.042    |            | 0.671        |
| Ceramide (d18:2/23:0)           | 0.056 ± 0.016    | 0.031 ± 0.014    |            | 0.059        |
| Ceramide (d18:2/24:0)           | 0.23 ± 0.06      | 0.11 ± 0.04      | 0.5        | <b>0.012</b> |
| Ceramide (d18:2/24:1)           | 0.08 ± 0.01      | 0.17 ± 0.05      | 2.0        | <b>0.011</b> |
| <b>Total Ceramides</b>          | <b>4.8 ± 0.5</b> | <b>5.9 ± 2.4</b> | <b>1.2</b> | 0.388        |
| Cholesteryl ester 14:0          | 1.1 ± 2.1        | 0.000 ± 0.000    |            | 0.356        |
| Cholesteryl ester 14:1          | 0.006 ± 0.012    | 0.000 ± 0.000    |            | 0.356        |
| Cholesteryl ester 15:0          | 2.3 ± 0.5        | 1.3 ± 0.4        | 0.6        | <b>0.014</b> |
| Cholesteryl ester 15:1          | 0.37 ± 0.10      | 0.17 ± 0.05      | 0.5        | <b>0.011</b> |
| Cholesteryl ester 16:0          | 38.4 ± 3.7       | 22.3 ± 12.0      | 0.6        | <b>0.043</b> |
| Cholesteryl ester 16:1          | 13.5 ± 8.3       | 14.5 ± 8.2       |            | 0.864        |
| Cholesteryl ester 17:0          | 1.6 ± 0.5        | 0.65 ± 0.78      |            | 0.073        |
| Cholesteryl ester 17:1          | 0.37 ± 0.27      | 0.37 ± 0.29      |            | 0.989        |
| Cholesteryl ester 18:0          | 2.6 ± 0.6        | 1.3 ± 1.1        |            | 0.078        |
| Cholesteryl ester 18:1          | 53.6 ± 8.7       | 29.1 ± 18.5      |            | 0.053        |
| Cholesteryl ester 18:2          | 212 ± 17         | 80.3 ± 67.5      | 0.4        | <b>0.009</b> |
| Cholesteryl ester 18:3          | 12.1 ± 1.7       | 4.4 ± 2.8        | 0.4        | <b>0.004</b> |
| Cholesteryl ester 20:0          | 1.1 ± 0.6        | 0.56 ± 0.68      |            | 0.260        |
| Cholesteryl ester 20:1          | 0.087 ± 0.175    | 0.000 ± 0.000    | 0.01       | 0.356        |
| Cholesteryl ester 20:3          | 3.6 ± 0.6        | 0.86 ± 1.12      | 0.2        | <b>0.005</b> |
| Cholesteryl ester 20:4          | 34.7 ± 7.8       | 14.1 ± 10.7      | 0.4        | <b>0.021</b> |
| Cholesteryl ester 20:5          | 15.7 ± 5.7       | 2.4 ± 1.9        | 0.2        | <b>0.004</b> |
| Cholesteryl ester 22:5          | 0.21 ± 0.25      | 0.000 ± 0.000    | 0.005      | 0.143        |
| Cholesteryl ester 22:6          | 5.0 ± 1.3        | 1.4 ± 1.1        | 0.3        | <b>0.005</b> |
| <b>Total Cholesteryl Esters</b> | <b>399 ± 18</b>  | <b>174 ± 114</b> | <b>0.4</b> | <b>0.008</b> |
| Diacylglyceride (14:0_14:0)     | 0.54 ± 0.12      | 0.49 ± 0.19      |            | 0.698        |
| Diacylglyceride (14:1_18:1)     | 0.000 ± 0.000    | 0.067 ± 0.133    | 67         | 0.356        |
| Diacylglyceride (14:1_20:2)     | 0.010 ± 0.019    | 0.011 ± 0.013    |            | 0.931        |
| Diacylglyceride (16:0_16:1)     | 0.085 ± 0.169    | 0.17 ± 0.34      |            | 0.674        |
| Diacylglyceride (16:0_18:1)     | 1.0 ± 1.2        | 2.3 ± 0.4        |            | 0.076        |
| Diacylglyceride (16:0_18:2)     | 1.1 ± 0.2        | 1.1 ± 0.5        |            | 0.978        |
| Diacylglyceride (16:0_20:4)     | 0.000 ± 0.000    | 0.48 ± 0.96      | 480        | 0.356        |
| Diacylglyceride (16:1_18:0)     | 0.000 ± 0.000    | 0.05 ± 0.10      | 50         | 0.356        |

|                                  |                    |                    |            |               |
|----------------------------------|--------------------|--------------------|------------|---------------|
| Diacylglyceride (16:1_18:2)      | 0.37 ± 0.04        | 0.48 ± 0.09        |            | 0.055         |
| Diacylglyceride (16:1_20:0)      | 0.048 ± 0.034      | 0.012 ± 0.013      |            | 0.097         |
| Diacylglyceride (17:0_18:1)      | 0.087 ± 0.106      | 0.31 ± 0.02        | 3.6        | <b>0.006</b>  |
| Diacylglyceride (18:1_18:1)      | 0.60 ± 0.07        | 1.4 ± 0.3          | 2.3        | <b>0.001*</b> |
| Diacylglyceride (18:1_18:2)      | 1.6 ± 0.3          | 2.4 ± 1.0          |            | 0.188         |
| Diacylglyceride (18:1_20:1)      | 0.000 ± 0.000      | 0.13 ± 0.16        | 130        | 0.134         |
| Diacylglyceride (18:2_18:2)      | 1.2 ± 0.1          | 1.3 ± 0.8          |            | 0.745         |
| Diacylglyceride (18:2_18:3)      | 0.28 ± 0.10        | 0.25 ± 0.06        |            | 0.653         |
| Diacylglyceride (18:2_18:4)      | 0.077 ± 0.090      | 0.10 ± 0.11        |            | 0.754         |
| Diacylglyceride (18:2_20:0)      | 0.000 ± 0.000      | 0.021 ± 0.041      | 21         | 0.356         |
| Diacylglyceride (18:2_20:4)      | 0.000 ± 0.000      | 0.50 ± 0.58        | 500        | 0.134         |
| Diacylglyceride (18:3_18:3)      | 0.10 ± 0.12        | 0.12 ± 0.04        |            | 0.741         |
| Diacylglyceride (21:0_22:6)      | 0.74 ± 0.21        | 0.77 ± 0.34        |            | 0.906         |
| Diacylglyceride O-(16:0_20:4)    | 0.005 ± 0.009      | 0.000 ± 0.000      | 0.2        | 0.356         |
| <b>Total Diacylglycerides</b>    | <b>7.8 ± 1.4</b>   | <b>12.5 ± 1.1</b>  | <b>1.6</b> | <b>0.002*</b> |
| Dihexosylceramide (d18:1/14:0)   | 0.10 ± 0.02        | 0.15 ± 0.04        | 1.6        | <b>0.042</b>  |
| Dihexosylceramide (d18:1/16:0)   | 1.3 ± 0.3          | 2.7 ± 0.6          | 2.0        | <b>0.007</b>  |
| Dihexosylceramide (d18:1/18:0)   | 0.09 ± 0.01        | 0.13 ± 0.03        | 1.5        | <b>0.039</b>  |
| Dihexosylceramide (d18:1/20:0)   | 0.04 ± 0.00        | 0.06 ± 0.01        | 1.5        | <b>0.030</b>  |
| Dihexosylceramide (d18:1/22:0)   | 0.10 ± 0.01        | 0.18 ± 0.06        | 1.7        | <b>0.042</b>  |
| Dihexosylceramide (d18:1/24:0)   | 0.08 ± 0.01        | 0.17 ± 0.08        |            | 0.080         |
| Dihexosylceramide (d18:1/24:1)   | 0.16 ± 0.02        | 0.64 ± 0.33        | 4.1        | <b>0.028</b>  |
| Dihexosylceramide (d18:1/26:0)   | 0.000 ± 0.000      | 0.004 ± 0.005      |            | 0.171         |
| Dihexosylceramide (d18:1/26:1)   | 0.001 ± 0.002      | 0.008 ± 0.003      | 7.4        | <b>0.009</b>  |
| <b>Total Dihexosylceramides</b>  | <b>1.9 ± 0.3</b>   | <b>4.0 ± 1.1</b>   | <b>2.1</b> | <b>0.008</b>  |
| Dihydroceramide (d18:0/18:0(OH)) | 0.000 ± 0.000      | 0.05 ± 0.06        | 50         | 0.165         |
| Dihydroceramide (d18:0/18:0)     | 0.003 ± 0.006      | 0.04 ± 0.05        |            | 0.232         |
| Dihydroceramide (d18:0/20:0)     | 0.02 ± 0.03        | 0.05 ± 0.07        |            | 0.364         |
| Dihydroceramide (d18:0/22:0)     | 0.09 ± 0.06        | 0.14 ± 0.11        |            | 0.376         |
| Dihydroceramide (d18:0/24:0)     | 0.19 ± 0.05        | 0.14 ± 0.05        |            | 0.214         |
| Dihydroceramide (d18:0/24:1)     | 0.12 ± 0.08        | 0.44 ± 0.34        |            | 0.111         |
| Dihydroceramide (d18:0/26:1(OH)) | 0.04 ± 0.08        | 0.13 ± 0.26        |            | 0.520         |
| <b>Total Dihydroceramides</b>    | <b>0.45 ± 0.20</b> | <b>0.99 ± 0.61</b> | <b>2.2</b> | 0.142         |

|                                 |                  |                    |             |               |
|---------------------------------|------------------|--------------------|-------------|---------------|
| Arachidonic acid                | 0.000 ± 0.000    | 3.2 ± 1.9          | 3.2         | <b>0.013</b>  |
| Docosahexaenoic acid            | 0.25 ± 0.07      | 0.92 ± 0.32        | 3.7         | <b>0.007</b>  |
| Eicosapentaenoic acid           | 0.073 ± 0.085    | 0.15 ± 0.15        |             | 0.401         |
| Octadecenoic acid               | 0.000 ± 0.000    | 14.6 ± 12.4        | 14.6        | 0.056         |
| Octadecadienoate                | 0.19 ± 0.38      | 2.4 ± 0.98         | 12.6        | <b>0.006*</b> |
| Eicosenoic acid                 | 0.015 ± 0.029    | 0.38 ± 0.62        | 25.9        | 0.284         |
| Eicosadienoic acid              | 0.000 ± 0.000    | 0.14 ± 0.16        | 140         | 0.139         |
| Eicosatrienoic acid             | 0.000 ± 0.000    | 0.077 ± 0.109      | 77.0        | 0.207         |
| <b>Total Fatty Acids</b>        | <b>0.5 ± 0.5</b> | <b>21.9 ± 15.6</b> | <b>41.6</b> | <b>0.034</b>  |
| Hexosylceramide (d16:1/22:0)    | 0.018 ± 0.005    | 0.015 ± 0.006      |             | 0.533         |
| Hexosylceramide (d16:1/24:0)    | 0.011 ± 0.003    | 0.014 ± 0.004      |             | 0.364         |
| Hexosylceramide (d18:1/14:0)    | 0.003 ± 0.006    | 0.011 ± 0.009      |             | 0.233         |
| Hexosylceramide (d18:1/16:0)    | 0.57 ± 0.11      | 0.88 ± 0.31        |             | 0.112         |
| Hexosylceramide (d18:1/18:0)    | 0.090 ± 0.011    | 0.068 ± 0.012      | 0.8         | <b>0.033</b>  |
| Hexosylceramide (d18:1/18:1)    | 0.036 ± 0.007    | 0.053 ± 0.012      |             | 0.050         |
| Hexosylceramide (d18:1/20:0)    | 0.14 ± 0.02      | 0.16 ± 0.04        |             | 0.480         |
| Hexosylceramide (d18:1/22:0)    | 1.4 ± 0.2        | 1.4 ± 0.7          |             | 0.954         |
| Hexosylceramide (d18:1/23:0)    | 0.69 ± 0.08      | 0.64 ± 0.29        |             | 0.766         |
| Hexosylceramide (d18:1/24:0)    | 0.73 ± 0.10      | 0.85 ± 0.44        |             | 0.598         |
| Hexosylceramide (d18:1/24:1)    | 2.0 ± 0.3        | 3.2 ± 1.6          |             | 0.195         |
| Hexosylceramide (d18:1/26:0)    | 0.032 ± 0.008    | 0.042 ± 0.013      |             | 0.201         |
| Hexosylceramide (d18:1/26:1)    | 0.023 ± 0.005    | 0.026 ± 0.008      |             | 0.630         |
| Hexosylceramide (d18:2/16:0)    | 0.003 ± 0.004    | 0.003 ± 0.003      |             | 0.803         |
| Hexosylceramide (d18:2/20:0)    | 0.001 ± 0.003    | 0.003 ± 0.003      |             | 0.591         |
| Hexosylceramide (d18:2/22:0)    | 0.24 ± 0.03      | 0.20 ± 0.06        |             | 0.297         |
| Hexosylceramide (d18:2/23:0)    | 0.11 ± 0.03      | 0.095 ± 0.015      |             | 0.553         |
| Hexosylceramide (d18:2/24:0)    | 0.35 ± 0.06      | 0.37 ± 0.11        |             | 0.785         |
| <b>Total Hexosylceramides</b>   | <b>6.5 ± 0.9</b> | <b>8.0 ± 3.4</b>   | <b>1.2</b>  | <b>0.415</b>  |
| Lysophosphatidylcholine a C16:0 | 14.4 ± 1.5       | 34.6 ± 12.5        | 2.4         | <b>0.018</b>  |
| Lysophosphatidylcholine a C16:1 | 0.14 ± 0.03      | 0.54 ± 0.28        | 3.8         | <b>0.031</b>  |
| Lysophosphatidylcholine a C17:0 | 0.30 ± 0.07      | 0.56 ± 0.33        |             | 0.177         |
| Lysophosphatidylcholine a C18:0 | 9.8 ± 1.1        | 16.1 ± 4.2         | 1.7         | <b>0.025</b>  |
| Lysophosphatidylcholine a C18:1 | 1.8 ± 0.2        | 4.7 ± 1.5          | 2.5         | <b>0.009</b>  |

|                                       |                   |                    |            |               |
|---------------------------------------|-------------------|--------------------|------------|---------------|
| Lysophosphatidylcholine a C18:2       | 1.0 ± 0.1         | 1.7 ± 0.9          |            | 0.189         |
| Lysophosphatidylcholine a C20:3       | 0.06 ± 0.12       | 0.24 ± 0.17        |            | 0.123         |
| Lysophosphatidylcholine a C20:4       | 0.30 ± 0.05       | 0.59 ± 0.28        |            | 0.096         |
| Lysophosphatidylcholine a C24:0       | 0.048 ± 0.006     | 0.062 ± 0.016      |            | 0.164         |
| Lysophosphatidylcholine a C26:0       | 0.045 ± 0.010     | 0.072 ± 0.032      |            | 0.167         |
| Lysophosphatidylcholine a C26:1       | 0.008 ± 0.016     | 0.071 ± 0.021      | 9.2        | <b>0.003*</b> |
| Lysophosphatidylcholine a C28:0       | 0.000 ± 0.000     | 0.098 ± 0.074      | 10.0       | <b>0.037</b>  |
| Lysophosphatidylcholine a C28:1       | 0.14 ± 0.03       | 0.19 ± 0.10        | 1.4        | 0.371         |
| <b>Total Lysophosphatidylcholines</b> | <b>28.1 ± 2.3</b> | <b>59.5 ± 19.7</b> | <b>2.1</b> | <b>0.019</b>  |
| Phosphatidylcholine aa C24:0          | 0.004 ± 0.007     | 0.016 ± 0.015      |            | 0.179         |
| Phosphatidylcholine aa C28:1          | 1.4 ± 0.2         | 1.9 ± 0.4          |            | 0.061         |
| Phosphatidylcholine aa C30:0          | 1.6 ± 0.1         | 4.9 ± 1.5          | 3.1        | <b>0.005</b>  |
| Phosphatidylcholine aa C32:0          | 5.0 ± 0.5         | 28.6 ± 8.6         | 5.7        | <b>0.002</b>  |
| Phosphatidylcholine aa C32:1          | 3.8 ± 2.9         | 37.2 ± 25.9        | 9.7        | <b>0.043</b>  |
| Phosphatidylcholine aa C32:2          | 0.66 ± 0.11       | 2.7 ± 1.7          | 4.1        | <b>0.049</b>  |
| Phosphatidylcholine aa C32:3          | 0.14 ± 0.02       | 0.20 ± 0.10        |            | 0.264         |
| Phosphatidylcholine aa C34:1          | 47.2 ± 9.0        | 192 ± 89.0         | 4.1        | <b>0.018</b>  |
| Phosphatidylcholine aa C34:2          | 79.0 ± 12.6       | 221 ± 135          |            | 0.081         |
| Phosphatidylcholine aa C34:3          | 2.6 ± 0.5         | 8.6 ± 5.3          |            | 0.064         |
| Phosphatidylcholine aa C34:4          | 0.30 ± 0.03       | 0.46 ± 0.31        |            | 0.332         |
| Phosphatidylcholine aa C36:1          | 11.9 ± 1.3        | 29.0 ± 9.3         | 2.4        | <b>0.011</b>  |
| Phosphatidylcholine aa C36:2          | 51.6 ± 6.5        | 120.0 ± 37.0       | 2.3        | <b>0.010</b>  |
| Phosphatidylcholine aa C36:3          | 24.4 ± 2.7        | 52.3 ± 20.3        | 2.2        | <b>0.034</b>  |
| Phosphatidylcholine aa C36:4          | 32.0 ± 6.1        | 79.2 ± 50.5        |            | 0.113         |
| Phosphatidylcholine aa C36:5          | 3.9 ± 1.1         | 4.2 ± 3.1          |            | 0.868         |
| Phosphatidylcholine aa C36:6          | 0.13 ± 0.02       | 0.16 ± 0.11        |            | 0.716         |
| Phosphatidylcholine aa C38:0          | 0.44 ± 0.01       | 0.96 ± 0.16        | 2.2        | <b>0.001*</b> |
| Phosphatidylcholine aa C38:3          | 11.1 ± 1.4        | 19.8 ± 6.0         | 1.8        | <b>0.030</b>  |
| Phosphatidylcholine aa C38:4          | 20.8 ± 5.3        | 52.6 ± 27.7        |            | 0.065         |
| Phosphatidylcholine aa C38:5          | 8.9 ± 0.7         | 14.7 ± 7.3         |            | 0.155         |
| Phosphatidylcholine aa C38:6          | 11.6 ± 2.0        | 21.8 ± 18.9        |            | 0.324         |
| Phosphatidylcholine aa C40:2          | 0.064 ± 0.003     | 0.15 ± 0.03        | 2.4        | <b>0.001*</b> |
| Phosphatidylcholine aa C40:3          | 0.13 ± 0.01       | 0.27 ± 0.06        | 2.2        | <b>0.004</b>  |

|                              |               |               |     |                |
|------------------------------|---------------|---------------|-----|----------------|
| Phosphatidylcholine aa C40:4 | 0.69 ± 0.21   | 1.2 ± 0.3     | 1.7 | <b>0.026</b>   |
| Phosphatidylcholine aa C40:5 | 1.7 ± 0.4     | 3.0 ± 1.2     |     | 0.079          |
| Phosphatidylcholine aa C40:6 | 4.3 ± 0.5     | 9.4 ± 7.1     |     | 0.201          |
| Phosphatidylcholine aa C42:0 | 0.108 ± 0.004 | 0.23 ± 0.05   | 2.1 | <b>0.002</b>   |
| Phosphatidylcholine aa C42:1 | 0.053 ± 0.004 | 0.12 ± 0.02   | 2.3 | <b>0.001*</b>  |
| Phosphatidylcholine aa C42:2 | 0.033 ± 0.038 | 0.12 ± 0.03   | 3.8 | <b>0.010</b>   |
| Phosphatidylcholine aa C42:4 | 0.045 ± 0.009 | 0.11 ± 0.02   | 2.4 | <b>0.001*</b>  |
| Phosphatidylcholine aa C42:5 | 0.067 ± 0.013 | 0.19 ± 0.06   | 2.8 | <b>0.009</b>   |
| Phosphatidylcholine aa C42:6 | 0.063 ± 0.073 | 0.19 ± 0.05   | 3.0 | <b>0.031</b>   |
| Phosphatidylcholine ae C30:0 | 0.13 ± 0.02   | 0.36 ± 0.08   | 2.8 | <b>0.001*</b>  |
| Phosphatidylcholine ae C30:1 | 0.000 ± 0.000 | 0.092 ± 0.085 | 92  | 0.073          |
| Phosphatidylcholine ae C30:2 | 0.033 ± 0.006 | 0.045 ± 0.017 |     | 0.260          |
| Phosphatidylcholine ae C32:1 | 0.81 ± 0.12   | 3.8 ± 1.3     | 4.7 | <b>0.003</b>   |
| Phosphatidylcholine ae C32:2 | 0.19 ± 0.03   | 0.92 ± 0.40   | 4.9 | <b>0.011</b>   |
| Phosphatidylcholine ae C34:0 | 0.42 ± 0.09   | 1.3 ± 0.3     | 3.2 | <b>0.002</b>   |
| Phosphatidylcholine ae C34:1 | 2.2 ± 0.3     | 9.9 ± 2.0     | 4.6 | <b>0.0002*</b> |
| Phosphatidylcholine ae C34:2 | 2.2 ± 0.5     | 5.2 ± 1.7     | 2.3 | <b>0.016</b>   |
| Phosphatidylcholine ae C34:3 | 1.5 ± 0.4     | 2.5 ± 0.6     | 1.7 | <b>0.040</b>   |
| Phosphatidylcholine ae C36:0 | 0.20 ± 0.02   | 0.67 ± 0.27   | 3.4 | <b>0.013</b>   |
| Phosphatidylcholine ae C36:1 | 2.3 ± 0.4     | 4.5 ± 2.7     |     | 0.147          |
| Phosphatidylcholine ae C36:2 | 2.4 ± 0.5     | 5.8 ± 3.5     |     | 0.104          |
| Phosphatidylcholine ae C36:3 | 1.3 ± 0.3     | 2.5 ± 0.6     | 1.9 | <b>0.012</b>   |
| Phosphatidylcholine ae C36:4 | 3.3 ± 1.1     | 6.4 ± 1.6     | 2.0 | <b>0.018</b>   |
| Phosphatidylcholine ae C36:5 | 2.2 ± 0.5     | 3.6 ± 0.5     | 1.7 | <b>0.005</b>   |
| Phosphatidylcholine ae C38:0 | 0.31 ± 0.02   | 0.40 ± 0.21   |     | 0.424          |
| Phosphatidylcholine ae C38:1 | 0.077 ± 0.026 | 0.53 ± 0.13   | 6.9 | <b>0.001*</b>  |
| Phosphatidylcholine ae C38:2 | 0.41 ± 0.03   | 0.95 ± 0.26   | 2.3 | <b>0.007</b>   |
| Phosphatidylcholine ae C38:3 | 1.1 ± 0.2     | 1.9 ± 0.8     |     | 0.120          |
| Phosphatidylcholine ae C38:4 | 2.3 ± 0.9     | 4.4 ± 1.3     | 1.9 | <b>0.037</b>   |
| Phosphatidylcholine ae C38:5 | 2.9 ± 0.7     | 7.0 ± 1.9     | 2.4 | <b>0.007</b>   |
| Phosphatidylcholine ae C38:6 | 1.2 ± 0.1     | 2.0 ± 0.2     | 1.6 | <b>0.0002*</b> |
| Phosphatidylcholine ae C40:1 | 0.18 ± 0.02   | 0.23 ± 0.07   | 1.3 | 0.253          |
| Phosphatidylcholine ae C40:2 | 0.54 ± 0.03   | 0.98 ± 0.41   | 1.8 | 0.078          |

|                                   |                    |                   |            |               |
|-----------------------------------|--------------------|-------------------|------------|---------------|
| Phosphatidylcholine ae C40:3      | 0.45 ± 0.07        | 0.91 ± 0.35       | 2.0        | <b>0.043</b>  |
| Phosphatidylcholine ae C40:4      | 0.55 ± 0.15        | 0.97 ± 0.21       | 1.8        | <b>0.016</b>  |
| Phosphatidylcholine ae C40:5      | 0.76 ± 0.12        | 1.4 ± 0.2         | 1.8        | <b>0.003</b>  |
| Phosphatidylcholine ae C40:6      | 0.65 ± 0.08        | 1.2 ± 0.4         | 1.9        | <b>0.029</b>  |
| Phosphatidylcholine ae C42:1      | 0.091 ± 0.007      | 0.15 ± 0.04       | 1.6        | <b>0.041</b>  |
| Phosphatidylcholine ae C42:2      | 0.100 ± 0.006      | 0.16 ± 0.02       | 1.6        | <b>0.003</b>  |
| Phosphatidylcholine ae C42:3      | 0.15 ± 0.01        | 0.26 ± 0.05       | 1.8        | <b>0.006</b>  |
| Phosphatidylcholine ae C42:4      | 0.18 ± 0.04        | 0.39 ± 0.07       | 2.2        | <b>0.002</b>  |
| Phosphatidylcholine ae C42:5      | 0.12 ± 0.24        | 1.1 ± 0.3         | 9.3        | <b>0.001*</b> |
| Phosphatidylcholine ae C44:3      | 0.036 ± 0.025      | 0.069 ± 0.016     |            | 0.066         |
| Phosphatidylcholine ae C44:4      | 0.070 ± 0.049      | 0.15 ± 0.03       | 2.1        | <b>0.033</b>  |
| Phosphatidylcholine ae C44:5      | 0.28 ± 0.08        | 0.82 ± 0.19       | 3.0        | <b>0.002</b>  |
| Phosphatidylcholine ae C44:6      | 0.22 ± 0.04        | 0.56 ± 0.12       | 2.5        | <b>0.002</b>  |
| <b>Total Phosphatidylcholines</b> | <b>357 ± 31.0</b>  | <b>981 ± 411</b>  | <b>2.7</b> | <b>0.023</b>  |
| Hydroxysphingomyelin C14:1        | 2.2 ± 0.6          | 2.6 ± 1.3         |            | 0.604         |
| Hydroxysphingomyelin C16:1        | 1.2 ± 0.3          | 1.1 ± 0.8         |            | 0.899         |
| Hydroxysphingomyelin C22:1        | 4.2 ± 1.0          | 2.9 ± 1.4         |            | 0.185         |
| Hydroxysphingomyelin C22:2        | 2.7 ± 0.5          | 2.7 ± 1.3         |            | 0.923         |
| Hydroxysphingomyelin C24:1        | 0.35 ± 0.10        | 0.47 ± 0.15       |            | 0.233         |
| Sphingomyelin C16:0               | 44.8 ± 8.9         | 61.0 ± 14.4       |            | 0.105         |
| Sphingomyelin C16:1               | 5.2 ± 0.9          | 7.9 ± 1.0         | 1.5        | <b>0.008</b>  |
| Sphingomyelin C18:0               | 9.0 ± 1.6          | 8.9 ± 5.3         |            | 0.968         |
| Sphingomyelin C18:1               | 3.6 ± 0.6          | 3.4 ± 1.9         |            | 0.917         |
| Sphingomyelin C20:2               | 0.12 ± 0.02        | 0.23 ± 0.14       |            | 0.180         |
| Sphingomyelin C24:0               | 6.7 ± 1.4          | 6.4 ± 2.2         |            | 0.832         |
| Sphingomyelin C24:1               | 13.5 ± 1.2         | 24.1 ± 6.6        | 1.8        | <b>0.020</b>  |
| Sphingomyelin C26:0               | 0.043 ± 0.005      | 0.061 ± 0.022     |            | 0.170         |
| Sphingomyelin C26:1               | 0.083 ± 0.006      | 0.17 ± 0.07       | 2.1        | <b>0.046</b>  |
| <b>Total Sphingomyelins</b>       | <b>93.6 ± 16.1</b> | <b>122 ± 32.0</b> | <b>1.3</b> | 0.168         |
| Triacylglycerides C44:1           | 0.20 ± 0.22        | 0.61 ± 0.75       | 3.0        | 0.335         |
| Triacylglycerides C44:2           | 0.09 ± 0.10        | 0.31 ± 0.41       | 3.5        | 0.332         |
| Triacylglycerides C46:2           | 0.34 ± 0.21        | 1.84 ± 2.40       | 5.4        | 0.260         |
| Triacylglycerides C48:0           | 2.00 ± 1.50        | 7.01 ± 7.65       | 3.5        | 0.246         |



|                         |              |               |      |              |
|-------------------------|--------------|---------------|------|--------------|
| Triacylglycerides C48:1 | 3.86 ± 2.13  | 16.72 ± 18.78 | 4.3  | 0.222        |
| Triacylglycerides C48:2 | 2.52 ± 0.97  | 14.43 ± 16.72 | 5.7  | 0.205        |
| Triacylglycerides C48:3 | 0.54 ± 0.13  | 2.81 ± 3.19   | 5.2  | 0.205        |
| Triacylglycerides C49:1 | 0.44 ± 0.09  | 1.18 ± 0.68   | 2.7  | 0.075        |
| Triacylglycerides C49:2 | 0.24 ± 0.08  | 0.93 ± 0.71   | 3.8  | 0.103        |
| Triacylglycerides C50:0 | 2.60 ± 1.48  | 8.33 ± 7.25   | 3.2  | 0.173        |
| Triacylglycerides C50:1 | 9.77 ± 2.52  | 39.62 ± 30.62 | 4.1  | 0.100        |
| Triacylglycerides C50:2 | 9.15 ± 1.41  | 46.31 ± 37.70 | 5.1  | 0.096        |
| Triacylglycerides C50:3 | 4.73 ± 0.55  | 21.31 ± 17.13 | 4.5  | 0.101        |
| Triacylglycerides C50:4 | 0.92 ± 0.20  | 3.17 ± 2.45   | 3.4  | 0.117        |
| Triacylglycerides C51:1 | 0.71 ± 0.18  | 1.84 ± 0.70   | 2.6  | <b>0.020</b> |
| Triacylglycerides C51:2 | 0.92 ± 0.17  | 2.70 ± 0.97   | 2.9  | <b>0.011</b> |
| Triacylglycerides C51:3 | 0.53 ± 0.13  | 1.43 ± 0.63   | 2.7  | <b>0.033</b> |
| Triacylglycerides C51:4 | 0.18 ± 0.04  | 0.45 ± 0.23   | 2.5  | 0.059        |
| Triacylglycerides C51:5 | 0.05 ± 0.00  | 0.14 ± 0.07   | 2.8  | <b>0.038</b> |
| Triacylglycerides C52:1 | 0.02 ± 0.03  | 0.19 ± 0.15   | 12.6 | 0.060        |
| Triacylglycerides C52:2 | 19.60 ± 2.02 | 66.60 ± 26.08 | 3.4  | <b>0.012</b> |
| Triacylglycerides C52:3 | 14.70 ± 2.92 | 42.43 ± 14.87 | 2.9  | <b>0.011</b> |
| Triacylglycerides C52:4 | 6.17 ± 1.60  | 14.79 ± 7.17  | 2.4  | 0.057        |
| Triacylglycerides C52:5 | 1.55 ± 0.37  | 3.51 ± 1.94   | 2.3  | 0.094        |
| Triacylglycerides C52:6 | 0.32 ± 0.08  | 0.67 ± 0.41   | 2.1  | 0.149        |
| Triacylglycerides C53:3 | 0.79 ± 0.21  | 1.86 ± 0.62   | 2.4  | <b>0.017</b> |
| Triacylglycerides C53:4 | 0.36 ± 0.09  | 0.85 ± 0.41   | 2.4  | 0.057        |
| Triacylglycerides C53:5 | 0.12 ± 0.03  | 0.27 ± 0.13   | 2.3  | 0.066        |
| Triacylglycerides C53:6 | 0.06 ± 0.01  | 0.16 ± 0.04   | 2.5  | <b>0.005</b> |
| Triacylglycerides C54:1 | 0.39 ± 0.12  | 1.33 ± 0.79   | 3.4  | 0.059        |
| Triacylglycerides C54:2 | 2.55 ± 0.33  | 10.08 ± 4.89  | 4.0  | <b>0.022</b> |
| Triacylglycerides C54:3 | 4.62 ± 0.56  | 18.77 ± 6.23  | 4.1  | <b>0.004</b> |
| Triacylglycerides C54:4 | 3.13 ± 0.44  | 9.20 ± 3.09   | 2.9  | <b>0.008</b> |
| Triacylglycerides C54:5 | 2.14 ± 0.31  | 4.95 ± 2.38   | 2.3  | 0.058        |
| Triacylglycerides C54:6 | 0.92 ± 0.18  | 1.87 ± 0.98   | 2.0  | 0.103        |
| Triacylglycerides C54:7 | 0.49 ± 0.19  | 0.91 ± 0.51   | 1.8  | 0.174        |
| Triacylglycerides C55:6 | 0.00 ± 0.00  | 0.00 ± 0.00   | 2.3  | <b>0.016</b> |

|                                  |                  |                  |            |               |
|----------------------------------|------------------|------------------|------------|---------------|
| Triacylglycerides C55:7          | 0.02 ± 0.00      | 0.05 ± 0.01      | 2.6        | <b>0.001*</b> |
| Triacylglycerides C55:8          | 0.02 ± 0.01      | 0.05 ± 0.02      | 2.4        | <b>0.015</b>  |
| Triacylglycerides C55:9          | 0.01 ± 0.00      | 0.02 ± 0.01      | 1.9        | 0.072         |
| Triacylglycerides C56:6          | 0.96 ± 0.24      | 1.92 ± 0.69      | 2.0        | <b>0.040</b>  |
| Triacylglycerides C56:7          | 0.85 ± 0.27      | 1.35 ± 0.49      | 1.6        | 0.123         |
| Triacylglycerides C56:8          | 0.52 ± 0.23      | 0.67 ± 0.27      | 1.3        | 0.414         |
| Triacylglycerides C56:9          | 0.21 ± 0.11      | 0.28 ± 0.15      | 1.3        | 0.518         |
| <b>Total Triglycerides</b>       | <b>100 ± 3</b>   | <b>354 ± 202</b> | <b>3.5</b> | <b>0.046</b>  |
| Trihexosylceramide (d18:1/16:0)  | 0.67 ± 0.10      | 1.4 ± 0.9        |            | 0.161         |
| Trihexosylceramide (d18:1/18:0)  | 0.069 ± 0.018    | 0.087 ± 0.059    |            | 0.578         |
| Trihexosylceramide (d18:1/24:1)  | 0.22 ± 0.04      | 0.96 ± 0.96      |            | 0.174         |
| Trihexosylceramide (d18:1/26:1)  | 0.015 ± 0.006    | 0.036 ± 0.033    |            | 0.255         |
| Trihexosylceramide (d18:1/20:0)  | 0.004 ± 0.001    | 0.006 ± 0.005    |            | 0.380         |
| Trihexosylceramide (d18:1/22:0)  | 0.049 ± 0.011    | 0.10 ± 0.08      |            | 0.237         |
| <b>Total Trihexosylceramides</b> | <b>1.0 ± 0.1</b> | <b>2.6 ± 2.0</b> | <b>2.5</b> | 0.176         |

Data expressed as mean ( $\mu\text{M}$ )  $\pm$  standard deviation. Values were normalized to apolipoprotein B content. P values  $<0.05$  are in bold. Ratios of LP-Z/LDL in italics were estimated for lipids or metabolites that showed  $\geq 5$ -fold increases or decreases despite a p-value that did not reach significance due to high variability in the small number of samples. The p-value threshold with Bonferroni correction is 0.003 for the 16 lipid/metabolite classes in Figure 5, and for each lipid species are as follows: Acylcarnitines = 0.004; Amino Acid Related = 0.010; Amino Acids = 0.017; Bile Acids = 0.005; Biogenic Amines = 0.05; Carbohydrates and Related = 0.05; Ceramides = 0.002; Cholesteryl Esters = 0.003; Diacylglycerides = 0.002; Dihexosylceramides = 0.006; Dihydroceramides = 0.007; Fatty Acids = 0.006; Hexosylceramides = 0.003; Lysophosphatidylcholines = 0.004; Phosphatidylcholines = 0.001; Sphingomyelins = 0.004; Triacylglycerides = 0.0011; Trihexosylceramides = 0.008. p-values less than these thresholds are considered statistically significant. \*Significant when taking into account Bonferroni correction.
